# Supplementary material for: Cardiomyocyte-Specific Wt1 Is Involved in Cardiac Metabolism and Response to Damage
Source: MDPI journal article supplement (doi:10.3390/jcdd10050211), 2023-05-12
Supplement: s1 [file s1]

**Supplementary Table S1.** Number of mice used for each Experiment. A total number of 31 control and 25 mutant mice were included in the study. ECGs for all these animals are shown in Table 1. 22 mice (12 controls, 10 mutants) were treated with doxorubicin, either chronically or acutely. Seven mice died after the tamoxifen treatment and before the experiments, without significant differences between control and mutants. Some untreated mice were unsuccessfully employed for cardiomyocyte isolation through FACS (not included in the results). Some samples from the same mice were used for two different techniques.

|                                |         |         | ECG before<br>Doxorubicin | ECG after<br>Doxorubicin | Fibrosis<br>(2/6 months) | Hypertrophy | Oxidative<br>stress | Cytometry | Proteomics |
|--------------------------------|---------|---------|---------------------------|--------------------------|--------------------------|-------------|---------------------|-----------|------------|
| Untreated                      |         | Control | 19                        |                          | 4                        | 2           | 3                   | 4         | 4          |
|                                |         | Mutant  | 15                        |                          | 5                        | 3           | 3                   | 7         | 3          |
| Treated<br>with<br>Doxorubicin | Chronic | Control | 9                         | 9                        | 3                        |             | 3                   |           | 2          |
|                                |         | Mutant  | 6                         | 6                        | 3                        |             | 3                   |           | 3          |
|                                | Acute   | Control | 3                         |                          | 3                        |             |                     | 3         |            |
|                                |         | Mutant  | 4                         |                          | 4                        |             |                     | 4         |            |

**Supplementary Table S2.** Primers used for qRT-PCR.

| Gene            | Oligonucleotide Sequences                              |
|-----------------|--------------------------------------------------------|
| Gapdh           | F: AGGTCGGTGTGAACGGATTTG<br>R: TGTAGACCATGTAGTTGAGGTCA |
| $\beta$ -actin  | F: CTTCTCCCTGGAGAAGAGC<br>R: ATGCCACAGGATTCCATACC      |
| Rplp0           | F: CACTGGTCTAGGACCCGAGAAG<br>R: GGTGCCTCTGGAGATTTTCG   |
| Wt1             | F: GCCTTCACCTTGCATTCTC<br>R: CGAAAGTGACCGTGCTGTAT      |
| Stim1           | F: CTGGGATCTCAGAGGGATTTGA<br>R: AGGCATGGCATTGAGAGCTT   |
| Tcf4            | F: AAGAAAGTCCAAAAGTTCC<br>R: CATCTTGCATGAAGAAGGAG      |
| Tead2           | F: GATAGAGTTCTCAGCGTTTG<br>R: TTCTTCTCAGGGAATTTGTC     |
| CamkII $\delta$ | F: GCTTTCTGCTAGGGACCATCA<br>R: ACTGGCATCAGCTTCACTGT    |
| Kcnk2           | F: CCATAGGATTTGGAAACATCTC<br>R: AAATGTGTCTTCCACTTTGG   |
| Cacng7          | F: GAATATTCTGAAGACAGTGCG<br>R: TTGATGCTGGAGATGTATAGG   |
| Kcna5           | F: ATTGGTGCTTTGTGTCTAAG<br>R: ATGCTTCTGTGAAGAAAGTC     |
| Tnnt2           | F: TTCGACCTGCAGGAAAAGTT<br>R: GCACAGCTTTGACGAGAACA     |

**Supplementary Table S3.** Antibodies used for Western blot, flow cytometry and immunofluorescence.

| Antibody                       | Supplier          | Reference  | Dilution |
|--------------------------------|-------------------|------------|----------|
| Rabbit monoclonal anti-WT1     | Abcam             | Ab89901    | 1/1000   |
| Rabbit monoclonal anti-Gapdh   | Abcam             | Ab181602   | 1/1000   |
| Rabbit polyclonal anti-Laminin | Sigma             | L9393      | 1/25     |
| Mouse monoclonal anti-CD31 APC | Thermo scientific | 17-0311-82 | 1/100    |
| Mouse monoclonal anti-CD31 PE  | Thermo scientific | 12-0311-82 | 1/100    |

**Supplementary Table S4.** Proteins differentially expressed in the heart of control mice and mice with conditional deletion of WT1 in cardiomyocytes. Only proteins with an adjusted p-value of <0.05 are shown.

| Protein                                                                                             | Abundance Ratio: (KO/WT) | Abundance Ratio p-value: (KO/WT) | Abundance Ratio Adj. P-value: (KO/WT) |
|-----------------------------------------------------------------------------------------------------|--------------------------|----------------------------------|---------------------------------------|
| 40S ribosomal protein S28 [OS=Mus musculus]                                                         | 0.76                     | 1.8068E-05                       | 0.00543673                            |
| Hemopexin [OS=Mus musculus]                                                                         | 0.786                    | 0.00100825                       | 0.04756075                            |
| Bcl-2-like protein 13 [OS=Mus musculus]                                                             | 0.839                    | 0.00104358                       | 0.04785978                            |
| Plasminogen activator inhibitor 1 RNA-binding protein [OS=Mus musculus]                             | 1.108                    | 0.00013922                       | 0.0191548                             |
| [Pyruvate dehydrogenase (acetyl-transferring)] kinase isozyme 2, mitochondrial [OS=Mus musculus]    | 1.149                    | 0.00010955                       | 0.0191548                             |
| Microsomal glutathione S-transferase 3 [OS=Mus musculus]                                            | 1.184                    | 0.00015607                       | 0.01982146                            |
| Methylcrotonoyl-CoA carboxylase beta chain, mitochondrial [OS=Mus musculus]                         | 3.103                    | 0.00042616                       | 0.03517967                            |
| Nicotinamide phosphoribosyltransferase [OS=Mus musculus]                                            | 1.125                    | 0.00051385                       | 0.03637986                            |
| Nucleosome assembly protein 1-like 4 [OS=Mus musculus]                                              | 1.163                    | 0.00057641                       | 0.03637986                            |
| Serine/threonine-protein phosphatase 2A 65 kDa regulatory subunit A alpha isoform [OS=Mus musculus] | 1.224                    | 0.00048514                       | 0.03637986                            |
| T-complex protein 1 subunit delta [OS=Mus musculus]                                                 | 1.342                    | 0.00048022                       | 0.03637986                            |
| Very-long-chain (3R)-3-hydroxyacyl-CoA dehydratase 2 [OS=Mus musculus]                              | 1.418                    | 0.00074713                       | 0.03979073                            |
| Glutathione S-transferase P 2 [OS=Mus musculus]                                                     | 1.19                     | 0.00086769                       | 0.04213413                            |

**Supplementary Table S5.** Proteins differentially expressed in the heart of control mice and mice with conditional deletion of WT1 in cardiomyocytes after chronic doxorubicin treatment. Only proteins with an adjusted p-value of <0.05 are shown.

| Protein                                                                      | Abundance Ratio: (KO/WT) | Abundance Ratio p-value: (KO/WT) | Abundance Ratio Adj. P-value: (KO/WT) |
|------------------------------------------------------------------------------|--------------------------|----------------------------------|---------------------------------------|
| myosin-6 [OS=Mus musculus]                                                   | 0.896                    | 0.00056                          | 0.0333711                             |
| Long-chain-fatty-acid--CoA ligase 1 [OS=Mus musculus]                        | 0.913                    | 5.21E-05                         | 0.00778969                            |
| Calsequestrin-2 [OS=Mus musculus]                                            | 0.93                     | 0.00046                          | 0.03328712                            |
| Ras-related protein Rap-1b [OS=Mus musculus]                                 | 0.95                     | 1.55E-05                         | 0.00386072                            |
| Enoyl-CoA hydratase, mitochondrial [OS=Mus musculus]                         | 1.056                    | 0.00059                          | 0.0333711                             |
| Prelamin-A/C [OS=Mus musculus]                                               | 1.088                    | 0.00104                          | 0.0333711                             |
| ubiquitin-conjugating enzyme E2 N [OS=Mus musculus]                          | 1.09                     | 0.00043                          | 0.03328712                            |
| glucose-6-phosphate isomerase [OS=Mus musculus]                              | 1.122                    | 0.00154                          | 0.04127835                            |
| Short-chain specific acyl-CoA dehydrogenase, mitochondrial [OS=Mus musculus] | 1.133                    | 0.00028                          | 0.02634984                            |
| Acylphosphatase-2 [OS=Mus musculus]                                          | 1.191                    | 0.00049                          | 0.03328712                            |
| Histone H2B type 1-B [OS=Mus musculus]                                       | 1.219                    | 0.0011165                        | 0.0333711                             |
| peptidyl-prolyl cis-trans isomerase A [OS=Mus musculus]                      | 1.23                     | 3.53E-05                         | 0.00660217                            |
| Aspartate aminotransferase, cytoplasmic [OS=Mus musculus]                    | 1.241                    | 0.00014                          | 0.01847603                            |
| Translationally-controlled tumor protein [OS=Mus musculus]                   | 1.246                    | 0.00168                          | 0.0434786                             |
| thioredoxin [OS=Mus musculus]                                                | 2.596                    | 0.00132                          | 0.03810134                            |
